# Supplementary material for: Architecture of Nanoantioxidant Based on Mesoporous Organosilica Trp-Met-PMO with Dipeptide Skeleton
Source: MDPI journal article supplement (doi:10.3390/ma16020638), 2023-01-09
Supplement: s1 [file s1]

# Architecture of Nanoantioxidant Based on Mesoporous Organosilica

## Trp-Met-PMO with Dipeptide Skeleton

Wanli Zhou, Haohua Ma, Yunqiao Dai, Yijing Du, Cheng Guo, Jianqiang Wang\*

*School of Chemistry and Molecular Engineering, Nanjing Tech University, 30 Puzhu South Road, Jiangsu, Nanjing, 211816, China*

*E-mail: jqwang@njtech.edu.cn*

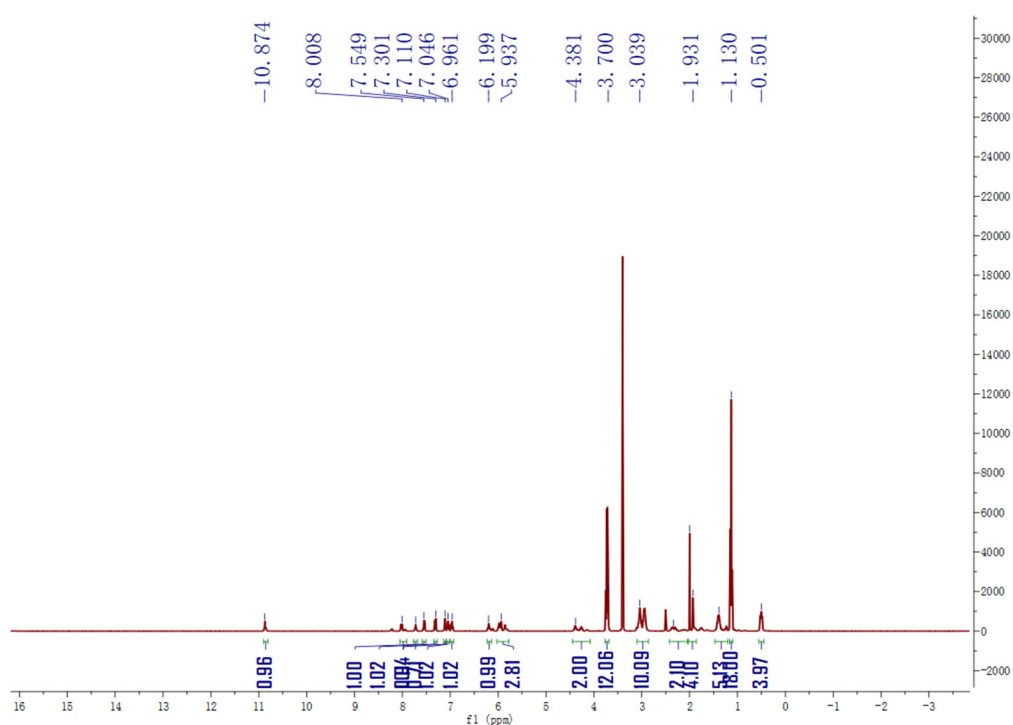

**Figure S1.**  $^1\text{H}$  NMR of organosilica precursor Trp-Met-Si

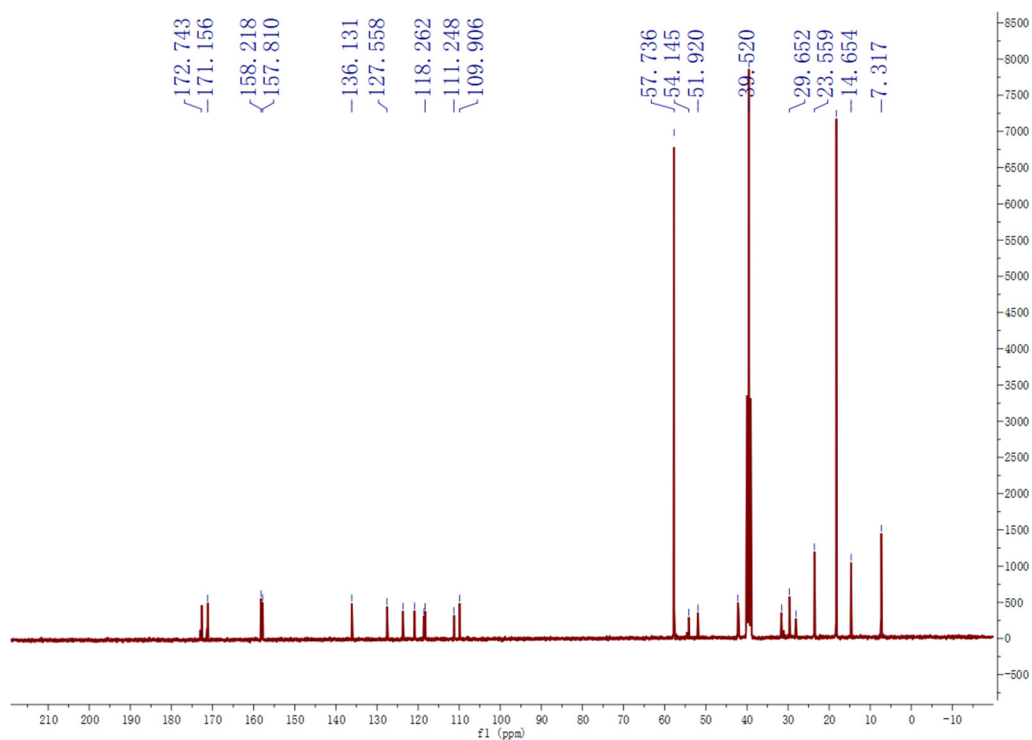

**Figure S2.** <sup>13</sup>C NMR of organosilica precursor Trp-Met-Si

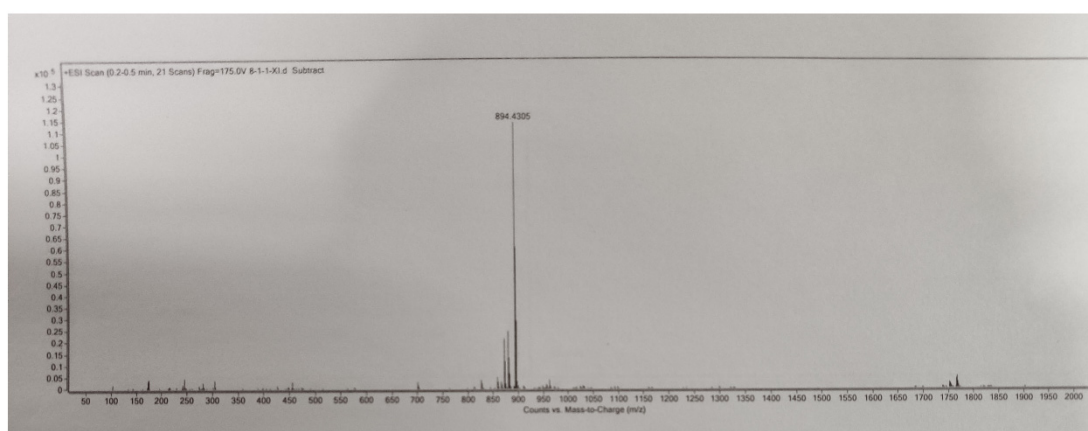

**Figure S3.** ESI-MS of organosilica precursor Trp-Met-Si

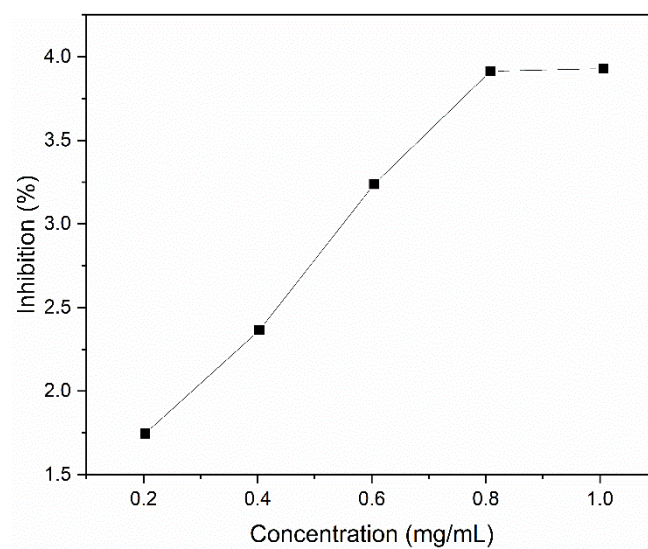

Figure S4. Scavenging effect of different concentrations of Trp-Met-20-PMO on ABTS free radicals
